# Supplementary material for: Parental Correlates of Outdoor Play in Boys and Girls Aged 0 to 12—A Systematic Review
Source: MDPI journal article supplement (doi:10.3390/ijerph16020190), 2019-01-11
Supplement: s1 [file s1]

**Table S2.** Extracted data of studies included in systematic review (gender-related findings).

| # | Author<br>(year)<br><br>Country                | Study design /<br>Data collection /<br>Participants<br>(sample size; age<br>range (mean);<br>gender; response<br>rate)                                                                | Outdoor Play<br><br>Definition<br><br>Measurement                                                                                                                                                                                                                                                                                                                                                                                                                                               | Parental correlates<br><br>Measurement                                                                                                                                                                                                                                                                                                                                                                                                   | Main findings of gender differences                                                                                                                                                                                                                                                                                                                                                                                                                                                                                                                                                                                                                                                                                                                                                                                                                                                                                                                   | Study<br>quality |
|---|------------------------------------------------|---------------------------------------------------------------------------------------------------------------------------------------------------------------------------------------|-------------------------------------------------------------------------------------------------------------------------------------------------------------------------------------------------------------------------------------------------------------------------------------------------------------------------------------------------------------------------------------------------------------------------------------------------------------------------------------------------|------------------------------------------------------------------------------------------------------------------------------------------------------------------------------------------------------------------------------------------------------------------------------------------------------------------------------------------------------------------------------------------------------------------------------------------|-------------------------------------------------------------------------------------------------------------------------------------------------------------------------------------------------------------------------------------------------------------------------------------------------------------------------------------------------------------------------------------------------------------------------------------------------------------------------------------------------------------------------------------------------------------------------------------------------------------------------------------------------------------------------------------------------------------------------------------------------------------------------------------------------------------------------------------------------------------------------------------------------------------------------------------------------------|------------------|
| 1 | Aarts et al.<br>(2010) [56]<br><br>Netherlands | <u>Study design</u><br>cross-sectional<br><br><u>Data collection</u><br>Sep 2007 - Jan<br>2008<br><br><u>Participants</u><br>n = 6,470<br>4-12 yrs (7.9 yrs)<br>49.9% (F)<br>rr = 60% | <u>Definition</u><br>natural way for<br>children to be<br>physically active<br>[56]; in contrast to<br>organized sports,<br>outdoor play is<br>cheap, informal<br>and easily<br>accessible [8]<br><br><u>Measurement</u><br><u>parental report:</u><br>(considering a<br>typical week in the<br>last mo./separately<br>questions for week-<br>and week-end<br>days): 'How many<br>days does your child<br>play outside on week-<br>days/weekends?';<br>'On average, how<br>long does your child | <u>Parents' perceived neighborhood<br/>physical environment</u><br>(1) degree of unoccupied houses<br>(2) presence of dog waste<br>(3) presence of water<br>(4) diversity of routes<br><br><u>Parents' perceived neighborhood social<br/>environment</u><br>(5) social cohesion<br><br><u>Measurements</u><br><u>parental report:</u> response options: Five-<br>point Likert scale from 'strongly agree' to<br>'strongly disagree' [93] | <u>Multivariate GEE analysis</u> (Relative rate; 95%<br>CI): - adjusted for parental education<br><br><u>Parents' perceived neighborhood physical<br/>environment</u><br>(1) positive association of the degree of<br>unoccupied houses and outdoor play in boys<br>(10-12 yrs, RR = 1.05, CI: 1.02, 1.08); no<br>association for girls (10-12 yrs)<br><br>(2) positive association of the presence of dog<br>waste and outdoor play in girls (4-6 yrs, RR =<br>1.03, CI: 1.00, 1.05); no association for boys (4-6<br>yrs)<br><br>(3) positive association of the presence of water<br>and outdoor play in boys (4-6 yrs, RR = 1.04, CI:<br>1.01, 1.07); no association for girls (4-6 yrs)<br><br>(4) positive association of the perceived<br>diversity of routes and outdoor play in girls (7-9<br>yrs, RR = 1.03, CI: 0.99, 1.06) and boys (10-12 yrs,<br>RR = 1.08, CI: 1.03, 1.13); no association for boys<br>(7-9 yrs) and girls (10-12 yrs) | high             |

|   |                                             |                                                                                                                              |                                  |                                                                                                                                                                                                                                                                   |                                                                                                                                                                                                                                                                                                                                                                                                                                                                                                                                                                                                                                                                                                                                                                                                   |
|---|---------------------------------------------|------------------------------------------------------------------------------------------------------------------------------|----------------------------------|-------------------------------------------------------------------------------------------------------------------------------------------------------------------------------------------------------------------------------------------------------------------|---------------------------------------------------------------------------------------------------------------------------------------------------------------------------------------------------------------------------------------------------------------------------------------------------------------------------------------------------------------------------------------------------------------------------------------------------------------------------------------------------------------------------------------------------------------------------------------------------------------------------------------------------------------------------------------------------------------------------------------------------------------------------------------------------|
|   |                                             | spend on out-door play on such a weekday/weekend day?' [93]                                                                  |                                  |                                                                                                                                                                                                                                                                   | <b><u>Parents' perceived neighborhood social environment</u></b><br>(5) positive association of perceived social cohesion and outdoor play in girls (10-12 yrs, RR = 1.02, CI: 1.01, 1.04); no association for boys (10-12 yrs)                                                                                                                                                                                                                                                                                                                                                                                                                                                                                                                                                                   |
| 2 | Cleland et al. (2010) [23]<br><br>Australia | <b><u>Study design</u></b><br>longitudinal                                                                                   | <b><u>Definition</u></b><br>n.r. | <b><u>Parenting practices</u></b><br>(1) outdoor social opportunities<br><b><u>Parents' social and cultural correlates</u></b><br>(2) parental encouragement                                                                                                      | <b><u>Longitudinal linear regression</u></b> (adjusted $\beta$ coefficient; 95% CI; p-value):<br>- adjusted for maternal education, parental marital status, outdoor tendencies, parental encouragement, social opportunities, supervision, dog ownership, yard size, home PA opportunities, weather                                                                                                                                                                                                                                                                                                                                                                                                                                                                                              |
|   |                                             | <b><u>Data collection</u></b><br>Jul - Dec 2001, 2004 and 2006<br>(The Children Living in Active Neighborhoods (CLAN) study) |                                  | <b><u>Measurements</u></b><br><b>parental report:</b><br>(1) four statements about who the child goes outside with (ICC 0.61-0.79)<br><br>(2) responses to two statements about encouragement of and success in getting the child to play outside (ICC 0.42-0.54) | <b><u>Parenting practices</u></b><br>(1) high social opportunities ( $\beta$ =169.7; CI: 25.9, 313.6; $p<0.05$ ) are positively associated with average weekly time (minutes/week) spent outdoors in boys (5-6 yrs) (ref low); no association of high social opportunities and outdoor play ( $p>0.05$ ) for girls (5-6 yrs)<br><br><b><u>Social and cultural correlates</u></b><br>(2) high parental encouragement ( $\beta$ =234.0; CI: 30.1, 437.8; $p<0.05$ ) is positively associated with average weekly time (minutes/week) spent outdoors in girls (5-6 yrs) (ref low); no association of high parental encouragement and outdoor play ( $p>0.05$ ) for boys (5-6 yrs)<br><br>(2) high parental encouragement ( $\beta$ =151.4; CI: 66.6, 236.2; $p<0.01$ ) is positively associated with |

fair

|   |                                                 |                                                                                                                 |                                                                                                                                                                                                                                   |                                                                                                                                                                                                                                                                                                                                        |                                                                                                                                                                                                                                       |      |
|---|-------------------------------------------------|-----------------------------------------------------------------------------------------------------------------|-----------------------------------------------------------------------------------------------------------------------------------------------------------------------------------------------------------------------------------|----------------------------------------------------------------------------------------------------------------------------------------------------------------------------------------------------------------------------------------------------------------------------------------------------------------------------------------|---------------------------------------------------------------------------------------------------------------------------------------------------------------------------------------------------------------------------------------|------|
|   |                                                 |                                                                                                                 |                                                                                                                                                                                                                                   |                                                                                                                                                                                                                                                                                                                                        | average weekly time (minutes/week) spent outdoors in girls (10-12 yrs) (ref low); no association of high parental encouragement and outdoor play (p>0.05) for boys (10-12 yrs)                                                        |      |
|   |                                                 | <b><u>Definition</u></b><br>n.r.                                                                                |                                                                                                                                                                                                                                   |                                                                                                                                                                                                                                                                                                                                        |                                                                                                                                                                                                                                       |      |
|   |                                                 | <b><u>Study design</u></b><br>cross-sectional                                                                   | <b><u>Measurement</u></b><br><b>parental report:</b><br><i>'Most of the time does your child play outdoors for at least 30 min per day? Do not count outdoor play during school hrs.'</i>                                         | <b><u>Parents' social and cultural correlates</u></b><br>(1) parental encouragement                                                                                                                                                                                                                                                    | <b>Multivariate models</b> ( $\beta$ coefficient; p-value):<br>- adjusted for sociodemographic variables, child's weight status, parent's PA                                                                                          |      |
|   |                                                 | <b><u>Data collection</u></b><br>2012 - 2014<br>(from Texas Childhood Obesity Research Demonstration (TX CORD)) | <i>30 min per day? Do not count outdoor play during school hrs.'</i>                                                                                                                                                              | <b><u>Parents' perceived neighborhood social environment</u></b><br>(2) neighborhood safety                                                                                                                                                                                                                                            | <b><u>Social and cultural correlates</u></b><br>(1) positive association of parental encouragement and child's reported outdoor play in girls ( $\beta=0.650$ ; p=0.018); no significant association for boys (p>0.05)                |      |
| 3 | Nicksic et al. (2018) [48]<br><br>United States | <b><u>Participants</u></b><br>n = 748<br>grade 5 (n.r.)<br>57.9% (F)<br>rr = ~90%                               | <b>child's report:</b> <i>'Last week, on what days did you play outdoors for at least 30 min or more? Do not count outdoor play during school hrs.'</i> (Spearman's correlation between child's and parents report 0.168; p=0.01) | <b><u>Measurements</u></b><br><b>parental report:</b><br>(1) extent of agreement with the statement 'If the weather is good, I encourage my child to play outside.'; (Likert scale: 'strongly disagree' to 'strongly agree') [109]<br><br>(2) 11-item scale (Cronbach's $\alpha=0.91$ ); adapted from the Teen Health 2000 Study [110] | <b><u>Parents' perceived neighborhood social environment</u></b><br>(2) positive association of perceived neighborhood safety ( $\beta=0.667$ ; p=0.033) and child's reported outdoor play in boys; no association for girls (p>0.05) | high |
| 4 | Wilkie et al. (2018) [57]                       | <b><u>Study design</u></b><br>cross-sectional                                                                   | <b><u>Definition</u></b><br>n.r.                                                                                                                                                                                                  | <b><u>Parents' perceived neighborhood physical environment</u></b><br>(1) traffic related safety concerns                                                                                                                                                                                                                              | <b>Multivariate logistic regression</b> (OR; 95% CI; p-value):<br>- adjusted for age, sex, SES                                                                                                                                        | high |
|   |                                                 | <b><u>Data collection</u></b>                                                                                   | <b><u>Measurement</u></b>                                                                                                                                                                                                         |                                                                                                                                                                                                                                                                                                                                        |                                                                                                                                                                                                                                       |      |

|                |                                                                                                             |                                                                                                                                                                                                                              |                                                                                                                                                                     |                                                                                                                                                                                                                                                                                                                                            |
|----------------|-------------------------------------------------------------------------------------------------------------|------------------------------------------------------------------------------------------------------------------------------------------------------------------------------------------------------------------------------|---------------------------------------------------------------------------------------------------------------------------------------------------------------------|--------------------------------------------------------------------------------------------------------------------------------------------------------------------------------------------------------------------------------------------------------------------------------------------------------------------------------------------|
| United Kingdom | Sep 2011 - Jan 2013 (from International Study of Childhood Obesity, Lifestyle and the Environment (ISCOLE)) | <b>child's report:</b><br><i>time spend outside 'on a school day after school before bedtime' and 'on a weekend day' ( '&lt;1hr'; '1hr'; '2hrs'; '3hrs'; '4hrs'; '5 or more hrs' (Diet and Lifestyle Questionnaire [120]</i> | <b>Measurements</b><br><b>parental report:</b><br><b>(1)</b> traffic related safety concerns (10 items): Neighborhood Environment Walkability Scale for Youth [118] | <b><u>Parents' perceived neighborhood physical environment</u></b><br><b>(1)</b> per increased unit in the traffic-related safety concerns score lower odds of spending more time outdoors after school in boys only (OR=0.52;CI: 0.28, 0.97; p=0.040) were found; no significant association for girls (OR=1.36, CI: 0.84, 2.21; p=0.207) |
|                | <b><u>Participants</u></b><br>n = 462<br>9-11 yrs (10.9 yrs)<br><i>girls: 55%</i><br>rr = n.r.              |                                                                                                                                                                                                                              |                                                                                                                                                                     |                                                                                                                                                                                                                                                                                                                                            |

Note: PA= physical activity; MVPA = moderate-to-vigorous physical activity; BMI= body mass index; rr = response rate; yrs = years; mo. (s) = month/months; n.r. = not reported; n.c. = not calculable; hr(s) = hour(s); min = minutes; italic and in green colored indications = self calculated
