# Supplementary material for: Parental Correlates of Outdoor Play in Boys and Girls Aged 0 to 12—A Systematic Review
Source: MDPI journal article supplement (doi:10.3390/ijerph16020190), 2019-01-11
Supplement: s1 [file s1]

**Table S3.** Quality assessment for all included studies <sup>a, b</sup>

| Introduction |                                   |               |                 |                              | Methods                                |                   |                             |                              |                                       |                                    | Results                                   |                                         |                                          |                   | Discussion                        |                        | Study quality               |                       |                 |                                  |                      |
|--------------|-----------------------------------|---------------|-----------------|------------------------------|----------------------------------------|-------------------|-----------------------------|------------------------------|---------------------------------------|------------------------------------|-------------------------------------------|-----------------------------------------|------------------------------------------|-------------------|-----------------------------------|------------------------|-----------------------------|-----------------------|-----------------|----------------------------------|----------------------|
| #            | Author (year)                     |               |                 |                              |                                        |                   |                             |                              |                                       |                                    |                                           |                                         |                                          |                   |                                   |                        |                             |                       |                 | Study quality score (percentage) | Study quality rating |
|              |                                   | 1. Objectives | 2. Study design | 3. Sample size justification | 4. Definition of the target population | 5. Sampling frame | 6. Sample selection process | 7. Address of non-responders | 8. Appropriateness aim(s) and outcome | 9. Appropriateness of measurements | 10. Clearness of statistical significance | 11. Sufficiently description of methods | 12. Adequately description of basic data | 13. Response rate | 14. Description of non-responders | 15. Consistent results | 16. Completeness of results | 17. Justified results | 18. Limitations |                                  |                      |
| 1            | Aarts et al. (2012) [58]          | 1             | 1               | 0                            | 1                                      | 1                 | 0.5                         | 0                            | 1                                     | 0                                  | 0.75                                      | 0.75                                    | 1                                        | 1                 | 0.75                              | 1                      | 0.5                         | 0.75                  | 1               | 13/18 (72.2)                     | high                 |
| 2            | Aarts et al. (2010) [56]          | 1             | 1               | 1                            | 1                                      | 1                 | 0.5                         | 0                            | 1                                     | 0                                  | 0.75                                      | 0.75                                    | 1                                        | 1                 | 0                                 | 1                      | 0.5                         | 0.5                   | 1               | 13/18 (72.2)                     | high                 |
| 3            | Bringolf-Isler et al. (2010) [59] | 1             | 0.75            | 0                            | 1                                      | 0.5               | 0.5                         | 0                            | 1                                     | 0                                  | 1                                         | 0.75                                    | 0.5                                      | 1                 | 0                                 | 0.75                   | 0.75                        | 1                     | 0.5             | 11/18 (61.1)                     | fair                 |
| 4            | Burdette et al. (2005) [60]       | 0.5           | 1               | 0                            | 1                                      | 0.75              | 0.5                         | 0                            | 0.75                                  | 0                                  | 0.75                                      | 1                                       | 1                                        | 0                 | 0                                 | 1                      | 1                           | 1                     | 1               | 11.25/18 (62.5)                  | fair                 |
| 5            | Carsley et al. (2016) [61]        | 1             | 0.75            | 0                            | 1                                      | 0.5               | 1                           | 0                            | 1                                     | 0                                  | 0.75                                      | 1                                       | 1                                        | 0                 | 0                                 | 1                      | 1                           | 1                     | 1               | 11.5/18 (63.9)                   | fair                 |
| 6            | Cleland et al. (2010) [23]        | 0.75          | 1               | 0                            | 1                                      | 0.5               | 1                           | 0                            | 1                                     | 0.5                                | 0.5                                       | 1                                       | 0.5                                      | 0                 | 0                                 | 1                      | 0.5                         | 1                     | 1               | 11.25/18 (62.5)                  | fair                 |
| 7            | Faulkner et al. (2015) [5]        | 1             | 1               | 0                            | 1                                      | 0.5               | 1                           | 0                            | 1                                     | 0                                  | 0.5                                       | 0.75                                    | 0.75                                     | 1                 | 0                                 | 1                      | 0.5                         | 1                     | 1               | 11.5/18 (63.9)                   | fair                 |

| #  | Author (year)                       | Study quality rating |                 |                              |                                        |                   |                             |                              |                                       |                                    |                                           |                                         |                                          |                   |                                   |                        |                             |                       |                 |                                  |             |
|----|-------------------------------------|----------------------|-----------------|------------------------------|----------------------------------------|-------------------|-----------------------------|------------------------------|---------------------------------------|------------------------------------|-------------------------------------------|-----------------------------------------|------------------------------------------|-------------------|-----------------------------------|------------------------|-----------------------------|-----------------------|-----------------|----------------------------------|-------------|
|    |                                     | 1. Objectives        | 2. Study design | 3. Sample size justification | 4. Definition of the target population | 5. Sampling frame | 6. Sample selection process | 7. Address of non-responders | 8. Appropriateness aim(s) and outcome | 9. Appropriateness of measurements | 10. Cleanness of statistical significance | 11. Sufficiently description of methods | 12. Adequately description of basic data | 13. Response rate | 14. Description of non-responders | 15. Consistent results | 16. Completeness of results | 17. Justified results | 18. Limitations | Study quality score (percentage) |             |
| 8  | Ferrao et al. (2015) [62]           | 1                    | 0.75            | 1                            | 1                                      | 0.75              | 0.5                         | 0                            | 1                                     | 0.5                                | 0                                         | 0.75                                    | 1                                        | 0                 | 0                                 | 0.75                   | 0                           | 1                     | 1               | 11/18 (61.1)                     | <i>fair</i> |
| 9  | Janssen (2015) [27]                 | 1                    | 0.75            | 1                            | 1                                      | 0.5               | 0.5                         | 0                            | 1                                     | 0.5                                | 1                                         | 1                                       | 1                                        | 0                 | 0.5                               | 1                      | 1                           | 0.75                  | 1               | 13/18 (72.2)                     | <i>high</i> |
| 10 | Kimbro et al. (2011) [63]           | 1                    | 0.75            | 0                            | 1                                      | 1                 | 0.75                        | 0                            | 1                                     | 0.75                               | 1                                         | 1                                       | 0.5                                      | 1                 | 1                                 | 1                      | 0.5                         | 0.75                  | 1               | 14/18 (77.8)                     | <i>high</i> |
| 11 | Marino et al. (2012) [64]           | 1                    | 0.75            | 0.5                          | 1                                      | 1                 | 0.75                        | 0                            | 1                                     | 0                                  | 1                                         | 1                                       | 1                                        | 0                 | 0.75                              | 1                      | 1                           | 1                     | 1               | 13.75/18 (76.3)                  | <i>high</i> |
| 12 | McDonald et al. (2015) [65]         | 1                    | 0.75            | 0                            | 1                                      | 0.5               | 0.5                         | 0                            | 1                                     | 0.75                               | 1                                         | 1                                       | 1                                        | 0                 | 0                                 | 1                      | 1                           | 1                     | 1               | 12/18 (66.7)                     | <i>high</i> |
| 13 | Nicksic et al. (2018) [48]          | 1                    | 0.75            | 0                            | 1                                      | 0.75              | 0.75                        | 0                            | 1                                     | 1                                  | 1                                         | 1                                       | 1                                        | 1                 | 1                                 | 1                      | 0.5                         | 1                     | 1               | 14.75/18 (81.9)                  | <i>high</i> |
| 14 | Remmers, Broeren et al. (2014) [68] | 1                    | 1               | 0                            | 1                                      | 0.5               | 0.75                        | 0                            | 0.75                                  | 0.5                                | 0.5                                       | 0.75                                    | 1                                        | 0                 | 0.5                               | 1                      | 0.75                        | 1                     | 0.75            | 11.5/18 (63.9)                   | <i>fair</i> |

| #  | Author (year)                        | Study quality rating |                 |                              |                                        |                   |                             |                              |                                       |                                    |                                           |                                         |                                          |                   |                                   |                        |                             |                       |                 | Study quality score (percentage) |             |
|----|--------------------------------------|----------------------|-----------------|------------------------------|----------------------------------------|-------------------|-----------------------------|------------------------------|---------------------------------------|------------------------------------|-------------------------------------------|-----------------------------------------|------------------------------------------|-------------------|-----------------------------------|------------------------|-----------------------------|-----------------------|-----------------|----------------------------------|-------------|
|    |                                      | 1. Objectives        | 2. Study design | 3. Sample size justification | 4. Definition of the target population | 5. Sampling frame | 6. Sample selection process | 7. Address of non-responders | 8. Appropriateness aim(s) and outcome | 9. Appropriateness of measurements | 10. Cleanness of statistical significance | 11. Sufficiently description of methods | 12. Adequately description of basic data | 13. Response rate | 14. Description of non-responders | 15. Consistent results | 16. Completeness of results | 17. Justified results | 18. Limitations |                                  |             |
| 15 | Remmers, Van Kann et al. (2014) [69] | 1                    | 1               | 0                            | 1                                      | 0.75              | 0                           | 0                            | 1                                     | 0.5                                | 1                                         | 1                                       | 1                                        | 0                 | 1                                 | 1                      | 0.5                         | 1                     | 1               | 12.75/18 (70.8)                  | <i>high</i> |
| 16 | Tandon et al. (2012) [55]            | 1                    | 1               | 0                            | 1                                      | 1                 | 1                           | 0                            | 0.5                                   | 0                                  | 1                                         | 0.75                                    | 1                                        | 0                 | 0                                 | 1                      | 0.75                        | 1                     | 1               | 11.25/18 (62.5)                  | <i>fair</i> |
| 17 | Wijtzes et al. (2014) [66]           | 1                    | 0.75            | 0.5                          | 1                                      | 1                 | 0.5                         | 0                            | 1                                     | 0                                  | 1                                         | 1                                       | 1                                        | 1                 | 1                                 | 1                      | 0.75                        | 0.75                  | 1               | 14.25/18 (79.2)                  | <i>high</i> |
| 18 | Wilkie et al. (2018) [57]            | 1                    | 0.75            | 0                            | 1                                      | 0.5               | 0.5                         | 0                            | 1                                     | 0                                  | 1                                         | 0.75                                    | 1                                        | 0                 | 1                                 | 1                      | 1                           | 0.75                  | 1               | 12.25/18 (68.1)                  | <i>high</i> |
| 19 | Xu et al. (2016) [70]                | 0.75                 | 1               | 0                            | 1                                      | 0.5               | 0.5                         | 0                            | 1                                     | 0.5                                | 1                                         | 1                                       | 1                                        | 0                 | 0.5                               | 1                      | 0                           | 1                     | 1               | 11.75/18 (65.3)                  | <i>fair</i> |
| 20 | Xu et al. (2017) [26]                | 1                    | 0.75            | 0                            | 1                                      | 0.5               | 0.5                         | 0                            | 1                                     | 0                                  | 1                                         | 1                                       | 1                                        | 0                 | 0.5                               | 1                      | 0                           | 1                     | 1               | 11.25/18 (62.5)                  | <i>fair</i> |
| 21 | Xu et al. (2014) [67]                | 1                    | 1               | 0                            | 1                                      | 1                 | 0.75                        | 0                            | 1                                     | 0                                  | 1                                         | 1                                       | 1                                        | 1                 | 0                                 | 1                      | 1                           | 1                     | 1               | 13.75/18 (76.4)                  | <i>high</i> |

*Note: italic written values are means of the quality assessment of both reviewers (BK, TM); a = rating points for quality assessment: criterion fulfilled = 1; partial fulfilled = 0.5; not fulfilled = 0; unclear = 0; not applicable = 0 (based on Bates & Stone [43]; Schoeppe et al. [42]); b = study quality rating: >66.7% (high study quality); 50-66.6% (fair study quality); <50% (low study quality) (based on Newell, Bowman and Cockburn, [44]).*
